# Supplementary material for: Setting Plasma Immersion Ion Implantation of Ar+ Parameters towards Electroforming-Free and Self-Compliance HfO2-Based Memristive Structures
Source: MDPI journal article supplement (doi:10.3390/nano14100831), 2024-05-09
Supplement: s1 [file s1]

# Supplementary Materials: Setting plasma immersion ion implantation of $\text{Ar}^+$ parameters towards electroforming-free and self-compliance $\text{HfO}_2$ -based memristive structures

Olga Permiakova <sup>\*</sup>, Sergey Pankratov, Alexandr Isaev , Andrew Miakonkikh , Yuri Chesnokov , Andrey Lomov  and Alexander Rogozhin <sup>\*</sup>

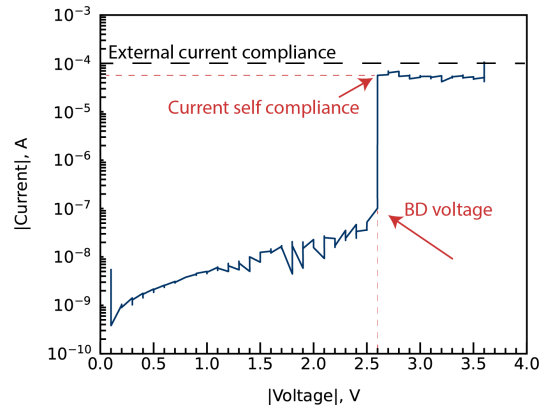

**Figure S1.** Example of electroforming process of Pt/ $\text{HfO}_2$ / $\text{HfO}_x\text{N}_y$ /TaN after plasma immersion ion implantation of  $\text{Ar}^+$  with energy 2 keV and fluence  $7.0 \cdot 10^{15} \text{ cm}^{-2}$ .

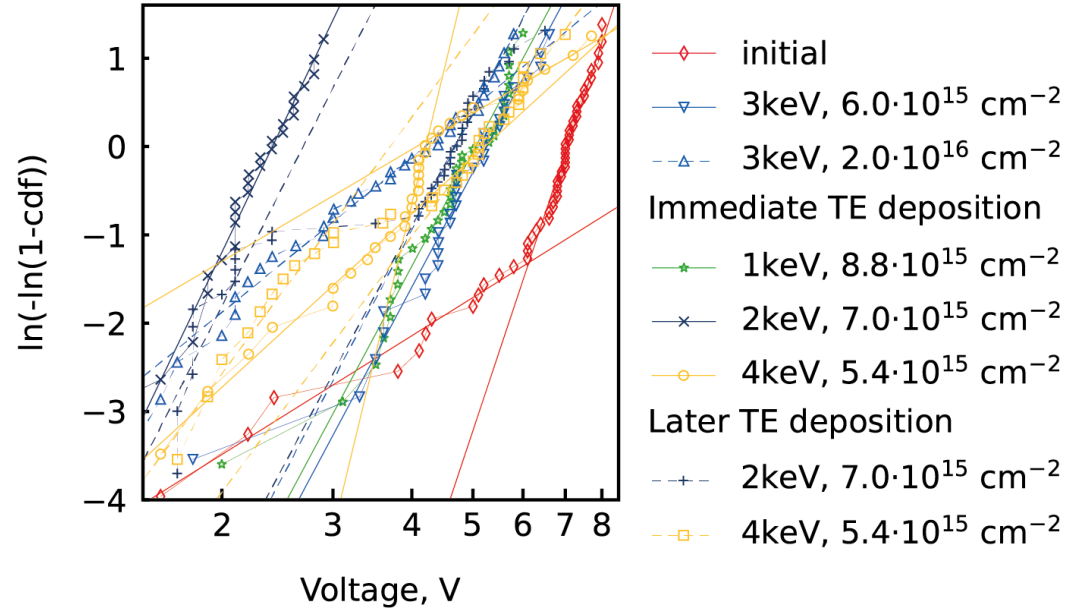

**Figure S2.** Fitted Weibull distributions of breakdown voltages for Pt/ $\text{HfO}_2$ / $\text{HfO}_x\text{N}_y$ /TaN structures subjected to plasma immersion ion implantation of  $\text{Ar}^+$ .

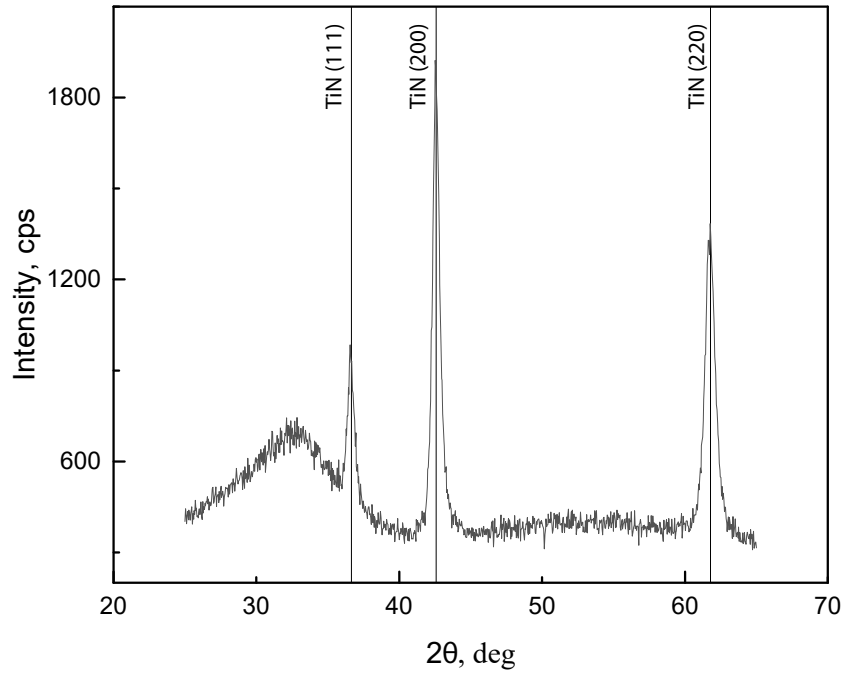

**Figure S3.** GIXRD spectra of the  $\text{HfO}_2/\text{HfO}_x\text{N}_y/\text{TaN}$  structure without implantation.

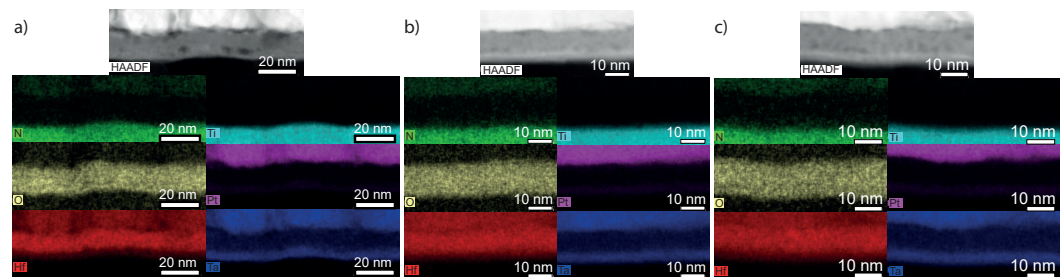

**Figure S4.** Cross-sectional HAADF-STEM image of the  $\text{Pt}/\text{HfO}_2/\text{HfO}_x\text{N}_y/\text{Ta}$  structures and corresponding EDS mapping of N, Ti, O, Pt, Hf and Ta without deconvolution. a) Cross-sectional HAADF-STEM image of the reference structure. b) Cross-sectional HAADF-STEM image of the structure after  $\text{Ar}^+$  plasma immersion ion implantation with the energy of 2 keV and fluence of  $7.0 \cdot 10^{15} \text{ cm}^{-2}$ . c) Cross-sectional HAADF-STEM image of the structure after  $\text{Ar}^+$  plasma immersion ion implantation with the energy of 4 keV and fluence of  $5.4 \cdot 10^{15} \text{ cm}^{-2}$ .

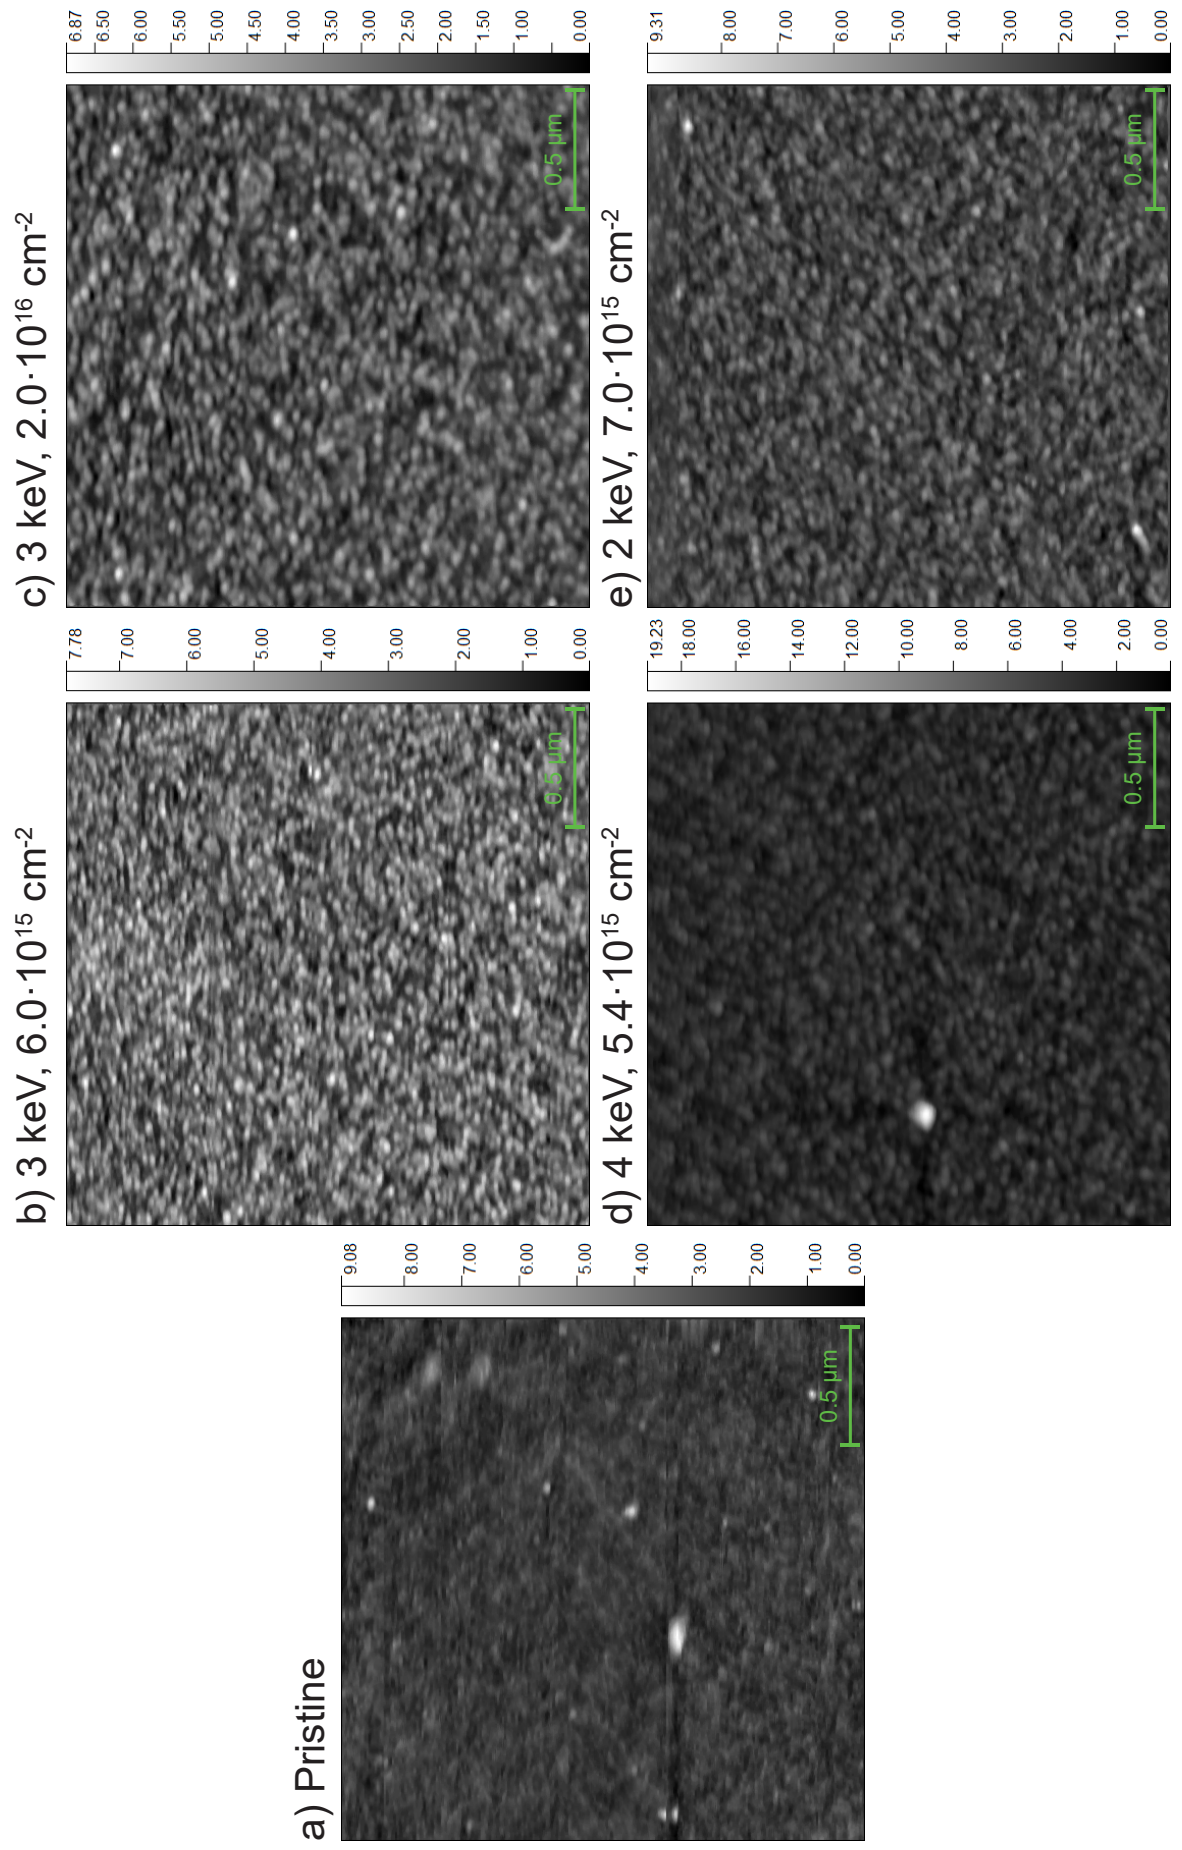

Figure S5. Images used to estimate surface roughness measured via AFM. The images were processed with a Fourier filter.

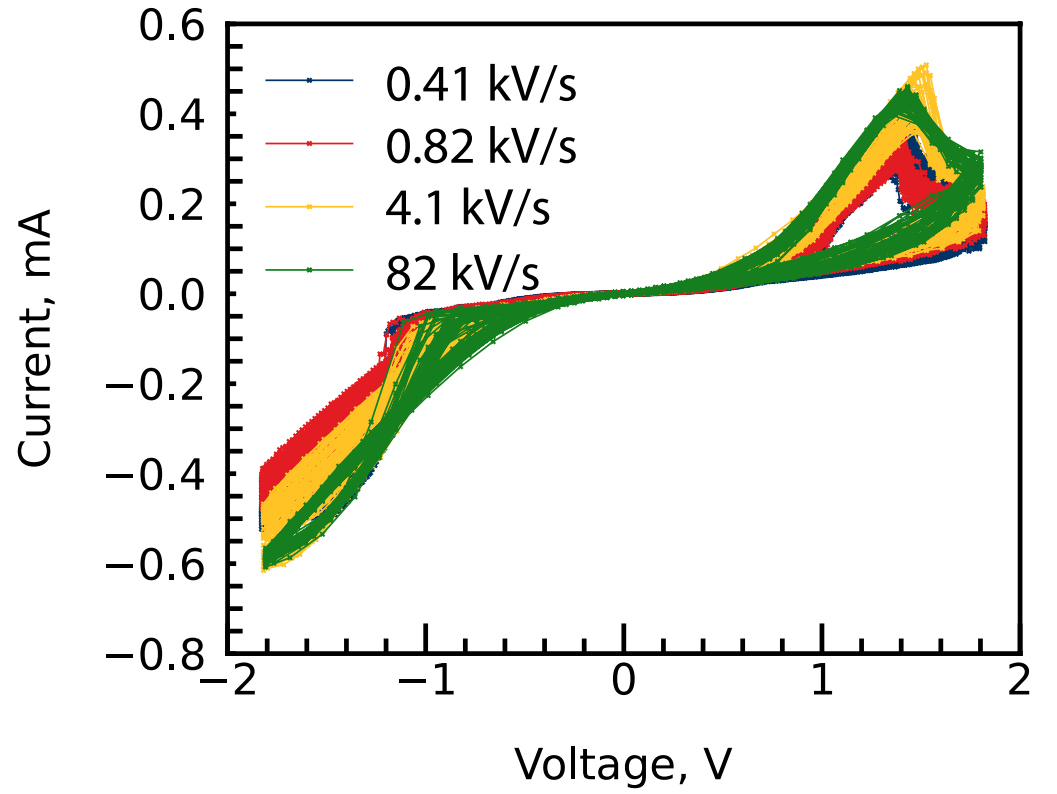

**Figure S6.** I-V characteristics of Pt/HfO<sub>2</sub>/HfO<sub>x</sub>N<sub>y</sub>/Ta<sub>2</sub>N structures subjected to plasma immersion ion implantation of Ar<sup>+</sup> with energy of 2 keV and fluence of  $7 \cdot 10^{15} \text{ cm}^{-2}$ .

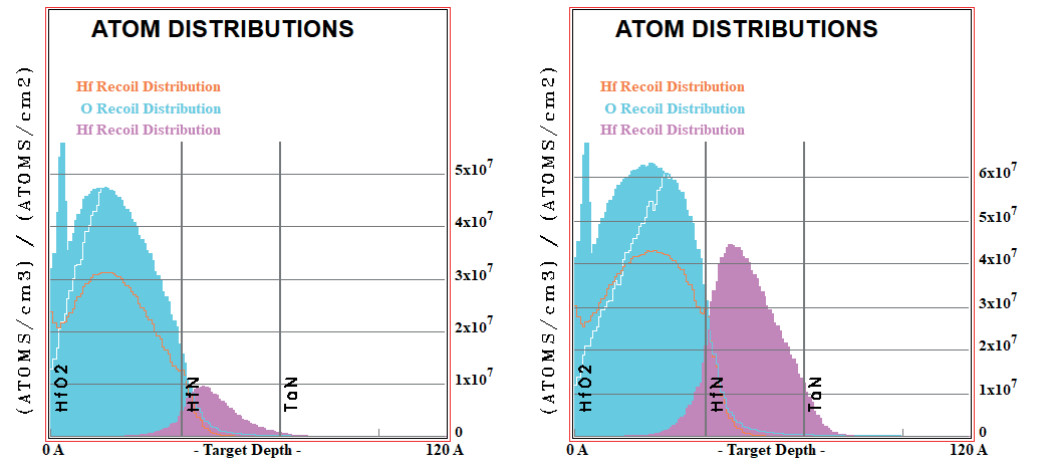

**Figure S7.** SRIM simulation of Hf atom displacements induced by Ar<sup>+</sup> plasma immersion ion implantation in HfO<sub>2</sub>/HfO<sub>x</sub>N<sub>y</sub>/Ta<sub>2</sub>N structure with energies of 2 keV (a) and of 4 keV (b).
